# Supplementary material for: Physicochemical and toxicological characteristics of welding fume derived particles generated from real time welding processes
Source: Royal Society of Chemistry journal article supplement (doi:10.1039/c2em30505d), 2012-11-23
Supplement: c2em30505d.pdf [file c2em30505d.pdf]

Supplement Figure 1: Day 4 real-time CCI adjusted PM<sub>2.5</sub> mass concentration with daily activity.

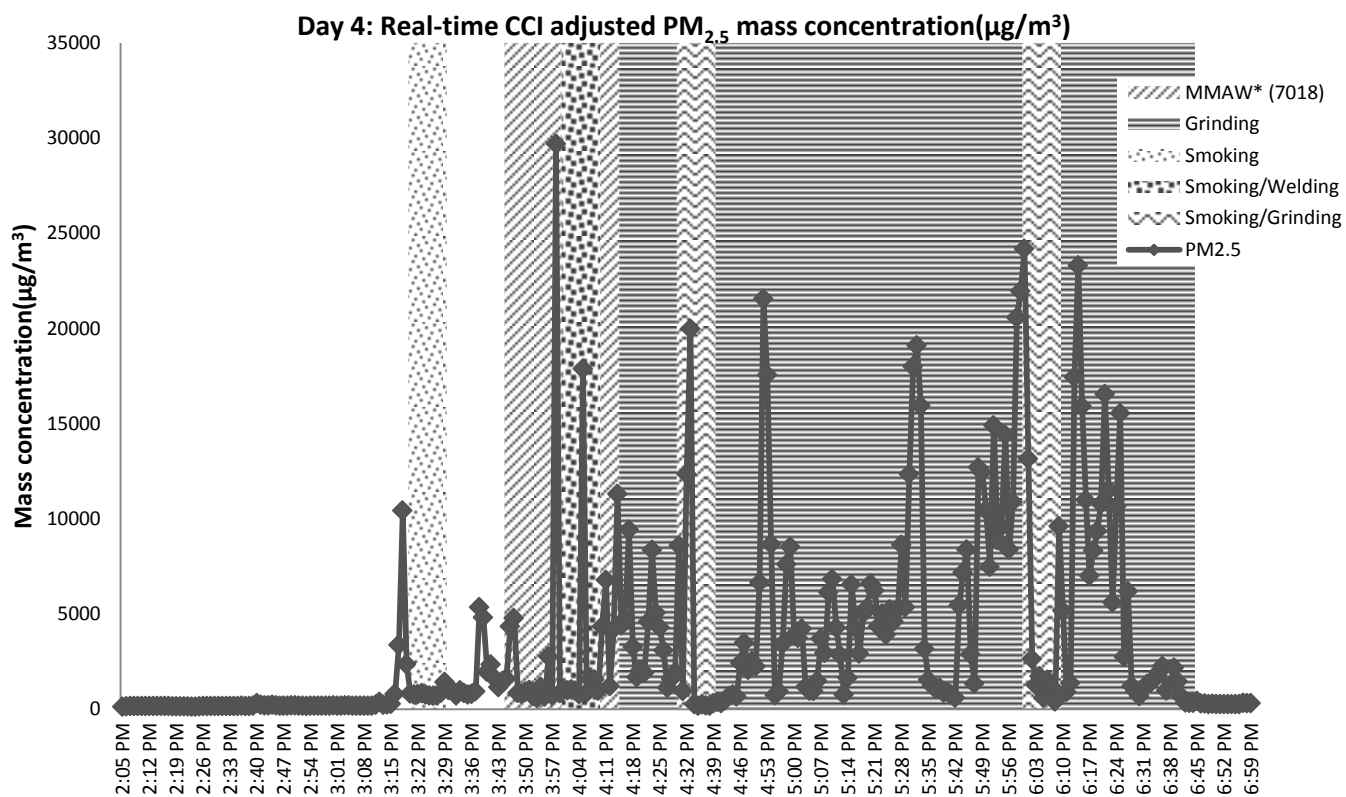

\*: Manual Metal-Arc Welding (MMAW)
